# Supplementary material
Source: PubMed Central journal article supplement (PMC4072726)
Supplement: la5004353_si_001.pdf [file la5004353_si_001.pdf]

Supporting information

# Lipid Concentration and Molar Ratio Boundaries for the Use of Isotropic Bicelles

*Maiwenn Beaugrand†, Alexandre A. Arnold†, Jérôme Hénin#, Dror E. Warschawski#§, Philip T. F. Williamson‡ and Isabelle Marcotte†\**

†Department of Chemistry, Université du Québec à Montréal, CQMF/GRASP, P.O. Box 8888, Downtown Station, Montreal, Canada H3C 3P8

#Laboratoire de Biochimie Théorique, CNRS, Université Paris Diderot and Institut de Biologie Physico-Chimique, 13 rue Pierre et Marie-Curie, 75005 Paris, France

§Laboratoire de Biologie Physico-Chimique des Protéines Membranaires, CNRS, Université Paris Diderot and Institut de Biologie Physico-Chimique, 13 rue Pierre et Marie-Curie, 75005 Paris, France

‡School of Biological Sciences, Highfield Campus, University of Southampton, Southampton, SO17 1BJ, UK

\*To whom correspondence should be addressed. Email: [marcotte.isabelle@uqam.ca](mailto:marcotte.isabelle@uqam.ca)

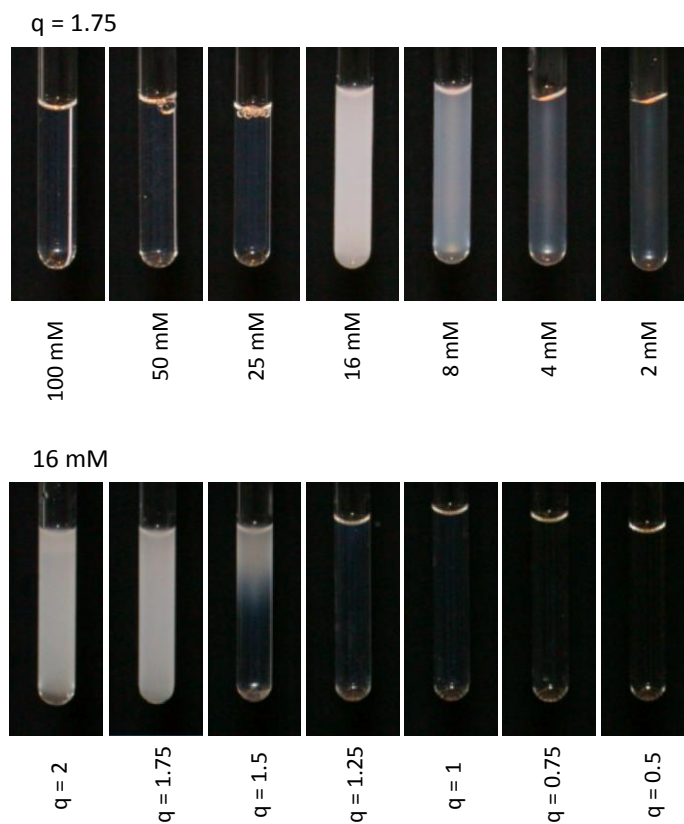

**Figure S1.** DMPC/DHPC samples with a molar ratio  $q$  of 1.75 at concentrations ranging from 100 to 2 mM (top) and a fixed concentration of 16 mM and  $q$  ratios ranging from 2 to 0.5. Data obtained at 25°C.

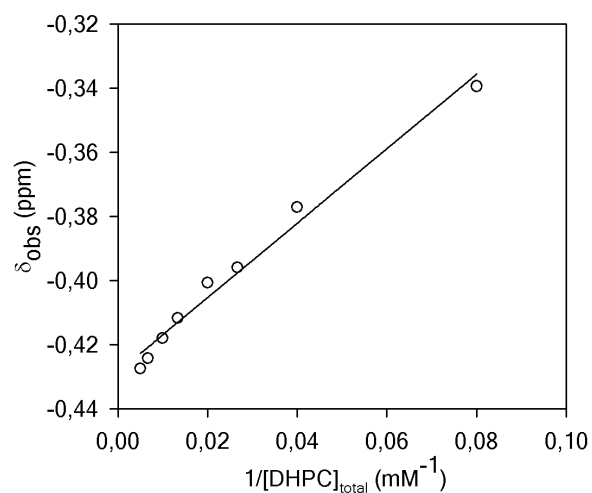

**Figure S2.** Variation of the observed  $^{31}\text{P}$  chemical shift of DHPC as a function of the inverse of DHPC concentration in DMPC/DHPC bicelle mixtures with  $q = 1$ . Data were obtained at  $25^\circ\text{C}$ .

**Table S1.** Bicelle disk radius calculated for  $q=1$  according to equation 4 from the effective  $q$  value  $q^*$ .

| Effective $q^*$ | Bicelle radius (nm) |
|-----------------|---------------------|
| 1               | 6.5                 |
| 1.1             | 7.1                 |
| 1.2             | 7.6                 |
| 1.3             | 8.2                 |
| 1.8             | 11.0                |
| 3.2             | 19.0                |

**Table S2.** Minimal total phospholipid concentration recommended to conserve the desired bicelle molar ratio  $q$ .

| $q$  | $[\text{DMPC}+\text{DHPC}]_{\text{min}}$<br>(mM) |
|------|--------------------------------------------------|
| 0.15 | 162                                              |
| 0.25 | 133                                              |
| 0.50 | 120                                              |
| 0.75 | 121                                              |
| 1.00 | 121                                              |
| 1.25 | 133                                              |
| 1.50 | 172                                              |
| 1.75 | 186                                              |
| 2.00 | 221                                              |

**Table S3.** Comparison of the experimental melting temperatures ( $T_m$ ) of DMPC-d<sub>54</sub> in DMPC/DHPC bicelles and expected  $T_m$  for an ideal mixed micelle at different  $q$  ratios.

| $q^a$ | Experimental<br>bicelle<br>$T_m$ (°C) <sup>a</sup> | Calculated mixed<br>micelle<br>$T_m$ (°C) |
|-------|----------------------------------------------------|-------------------------------------------|
| 0     | -                                                  | -46.0 <sup>b</sup>                        |
| 0.5   | 6.0±0.3                                            | -23.7                                     |
| 1     | 17.0±0.9                                           | -12.5                                     |
| 2     | 21.0±0.9                                           | -1.3                                      |
| 3     | 21.0±0.9                                           | 4.3                                       |
| ∞     | 21.0±0.3                                           | 21.0                                      |

<sup>a</sup>Total lipid concentration of 400 mM, therefore  $q = q^*$

<sup>b</sup> $T_m$  of pure DHPC from Sakuma, Y.; Taniguchi, T.; Imai, M. Pore Formation in a Binary Giant Vesicle Induced by Cone-Shaped Lipids. Biophys. J. 2010, 99, 472–479.
